# Supplementary material
Source: PubMed Central journal article supplement (PMC5908236)
Supplement: NIHMS823434-supplement-8.pdf [file NIHMS823434-supplement-8.pdf]

**Table S1 Primers for Realtime analysis**

| <b>Primers to detect following human genes:</b>  |
|--------------------------------------------------|
| 18S (forward), 5'-TGCATGGCCGTTCTTAGTTG-3'        |
| 18S (reverse), 5'-AGTTAGCATGCCAGAGTCTCGTT-3'     |
| XBP1s (forward), 5'-CCCTCCAGAACATCTCCCCAT-3'     |
| XBP1s (reverse), 5'-ACATGACTGGGTCCAAGTTGT-3'     |
| HERPUD1 (forward), 5'-CCCTCCAGAACATCTCCCCAT-3'   |
| HERPUD1 (reverse), 5'-ACATGACTGGGTCCAAGTTGT-3'   |
| HSPA5 (forward), 5'-CATCACGCCGTCCTATGTGCG-3'     |
| HSPA5 (reverse), 5'-CGTCAAAGACCGTGTCTCG-3'       |
| PDI (forward), 5'-GCTGAGGAGTTTGGTGTGAC-3'        |
| PDI (reverse), 5'-AGAAGCCAATGACCACTAGGT-3'       |
| CD14 (forward), 5'-ACGCCAGAACCTTGTGAGC-3'        |
| CD14 (reverse), 5'-GCATGGATCTCCACCTCTACTG-3'     |
| CD40 (forward), 5'-ACTGAAACGGAATGCCTTCT-3'       |
| CD40 (reverse), 5'-CCTCACTCGTACAGTGCCA-3'        |
| CXCL 10 (forward), 5'-GTGGCATTCAAGGAGTACCTC-3'   |
| CXCL 10 (reverse), 5'-TGATGGCCTTCGATTCTGGATT-3'  |
| SOD2 (forward), 5'-GCTCCGTTTTGGGGTATCTG-3'       |
| SOD2 (reverse), 5'-GCGTTGATGTGAGTTCCAG-3'        |
| NOS2 (forward), 5'-TTCAGTATCACAACCTCAGCAAG-3'    |
| NOS2 (reverse), 5'-TGGACCTGCAAGTAAAATCCC-3'      |
|                                                  |
| <b>Primers for following mouse genes:</b>        |
| 18S (forward), 5'-AGTCCCTGCCCTTTGTACACA-3'       |
| 18S (reverse), 5'-CGTTCCGAGGGCCTCACT-3'          |
| Dnajb9 (forward), 5'-CCCCAGTGTCAAACCTGTACCAG-3'  |
| Dnajb9 (reverse), 5'-AGCGTTTCCAATTTTCCATAAATT-3' |
| Hspa5 (forward), 5'-TCATCGGACGCACTTGGAA-3'       |
| Hspa5 (reverse), 5'-CAACCACCTTGAATGGCAAGA-3'     |
| Herpud1 (forward), 5'-CATGTACCTGCACCACGTGCG-3'   |
| Herpud1 (reverse), 5'-GAGGACCACCATCATCCGG-3'     |
| Pdia3 (forward), 5'-CAAGATCAAGCCCCACCTGAT-3'     |
| Pdia3 (reverse), 5'-AGTTCGCCCAACCAGTACTT-3'      |
| Acaca (forward), 5'-GATGAACCATCTCCGTTGGC-3'      |
| Acaca (reverse), 5'-GACCCAATTATGAATCGGGAGTG-3'   |
| Acacb (forward), 5'-CGCTCACCAACAGTAAGGTGG-3'     |
| Acacb (reverse), 5'-GCTTGGCAGGGAGTTCCTC-3'       |
| Dgat2 (forward), 5'-GCGCTACTTCCGAGACTACTT-3'     |
| Dgat2 (reverse), 5'-GGGCCTTATGCCAGGAAACT-3'      |
| Fasn (forward), 5'-GGAGGTGGTGATAGCCGGTAT-3'      |
| Fasn (reverse), 5'-TGGGTAATCCATAGAGCCCAG-3'      |
| Scd1 (forward), 5'-TTCTTGCGATACACTCTGGTGC-3'     |
| Scd1 (reverse), 5'-TTCTTGCGATACACTCTGGTGC-3'     |

|                                                         |
|---------------------------------------------------------|
| <i>Hgf</i> (forward), 5'-ATGTGGGGGACCAAACCTTCTG-3'      |
| <i>Hgf</i> (reverse), 5'-GGATGGCGACATGAAGCAG-3'         |
| <i>Il-1</i> (forward), 5'-GCAACTGTTCTGAACTCAACT-3'      |
| <i>Il-1</i> (reverse), 5'-ATCTTTTGGGGTCCGTCAACT-3'      |
| <i>Il-1-r1</i> (forward), 5'-GTGCTACTGGGGCTCATTTGT-3'   |
| <i>Il-1-r1</i> (reverse), 5'-GGAGTAAGAGGACACTTGCGAAT-3' |
| <i>Il-4</i> (forward), 5'-GGTCTCAACCCCCAGCTAGT-3'       |
| <i>Il-4</i> (reverse), 5'-GCCGATGATCTCTCTCAAGTGAT-3'    |
| <i>Il-6</i> (forward), 5'-CCAAGAGGTGAGTGCTTCCC-3'       |
| <i>Il-6</i> (reverse), 5'-CTGTTGTTCCAGACTCTCTCCCT-3'    |
| <i>Il-10</i> (forward), 5'-GCTCTTACTGACTGGCATGAG-3'     |
| <i>Il-10</i> (reverse), 5'-CGCAGCTCTAGGAGCATGTG-3'      |
| <i>lfn3</i> (forward), 5'-GCCACGGCACAGTCATTGA-3'        |
| <i>lfn3</i> (reverse), 5'-TGCTGATGGCCTGATTGTCTT-3'      |
| <i>Ccl2</i> (forward), 5'-TTAAAAACCTGGATCGGAACCAA-3'    |
| <i>Ccl2</i> (reverse), 5'-GCATTAGCTTCAGATTTACGGGT-3'    |
| <i>Ccl4</i> (forward), 5'-TCCCTGCTGTTTCTCTTACACCT-3'    |
| <i>Ccl4</i> (reverse), 5'-CTGTCTGCCTCTTTTGGTCAG-3'      |
| <i>Ccl5</i> (forward), 5'-GCTGCTTTGCCTACCTCTCC-3'       |
| <i>Ccl5</i> (reverse), 5'-TCGAGTGACAAACACGACTGC-3'      |
| <i>Cxcr2</i> (forward), 5'-CAGCATGGCTCATTACCAGA-3'      |
| <i>Cxcr2</i> (reverse), 5'-GCATACCAAGATGGAAGGGA-3'      |
| <i>Cxcl10</i> (forward), 5'-CCAAGTGCTGCCGTCATTTTC-3'    |
| <i>Cxcl10</i> (reverse), 5'-GGCTCGCAGGGATGATTTCAA-3'    |
| <i>Cd14</i> (forward), 5'-CTCTGTCCTTAAAGCGGCTTAC-3'     |
| <i>Cd14</i> (reverse), 5'-GTTGCGGAGGTTCAAGATGTT-3'      |
| <i>Cd40</i> (forward), 5'-TGTCATCTGTGAAAAGGTGGTC-3'     |
| <i>Cd40</i> (reverse), 5'-ACTGGAGCAGCGGTGTTATG-3'       |
| <i>Sod2</i> (forward), 5'-CAGACCTGCCTTACGACTATGG-3'     |
| <i>Sod2</i> (reverse), 5'-CTCGGTGGCGTTGAGATTGTT-3'      |
| <i>Nos2</i> (forward), 5'-GTTCTCAGCCCAACAATAACAAGA-3'   |
| <i>Nos2</i> (reverse), 5'-GTGGACGGGTCGATGTCAC-3'        |
| <i>Ddit3</i> (forward), 5'-CCACCACACCTGAAAGCAGAA-3'     |
| <i>Ddit3</i> (reverse), 5'-AGGTGAAAGGCAGGGACTCA-3'      |
| <i>Xbp1s</i> (forward), 5'-GGTCTGCTGAGTCCGCAGCAGG-3'    |
| <i>Xbp1s</i> (reverse), 5'-AGGCTTGGTGTATACATGG-3'       |
